# Supplementary material for: Response surface optimization and flavor determination of fermentation processes of orange peel tea wine
Source: PeerJ. 2025 May 9;13:e19357. doi: 10.7717/peerj.19357 (PMC12068252; doi:10.7717/peerj.19357)
Supplement: Supplemental Information 1 — The optimal fermentation conditions were as follows: material ratio 1:3, yeast content 4.9%, fermentation temperature 29 °C, sucrose content 29%, fermentation time 7 days. Under these conditions, the orange peel tea wine had unique taste, typical style, best sensory score, alcohol content of 12.46%vol, total sugar 12.1 g/L, total acid 5.1 g/L, pH3.88. The main change indexes in the fermentation process of orange peel tea wine were determined, and the results were consistent with the fermentation law of orange peel tea wine. The total flavonoid content of orange peel tea wine was 0.48 mg/mL, the total phenol content was 2.32 mg/mL, the DPPH free radical clearance rate was 90.8%, the ·OH free radical clearance rate was 77.3%, and the antioxidant ability was good. Through gas chromatography-mass spectrometry (GC-MS), 26 kinds of aroma substances were detected, and the main aroma substances were ethanol, 3-methyl-1-butanol, 2-methyl-1-propanol, phenylethyl alcohol, acetic acid, n-hexadecanoic acid, 2,4-di-tert-butylphenol and other compounds. [file peerj-13-19357-s001.xlsx]

## Sheet: Sheet1
	A	B	C	D	E
	5.03333	4.5	4.03333	3.46667	3.23333			fig9 Total sugar content change	fig11 Total acid content change	fig10 pH change	fig8 Yeast number change
1	5.4	3.7	3.7	3.5	3.7			total sugar	total acid	PH	The number of yeast
2	4.4	5.3	4.7	3.7	4		1	42.33	3.15	3.95	0.56
3	5.3	4.5	3.7	3.2	2		2	31.9	3.19	3.88	0.57
							3	25	3.5	3.87	2.43
							4	17.1	3.68	3.84	3.63
							5	16.7	4.3	3.82	6.37
							6	13.8	5.27	3.79	8.03	fig11 Total acid content change			standard error	fig10 pH change			standard deviation
							7	12.1	5.1	3.88	7.93	3.13	3.17	3.15	0.02	3.95	3.97	3.93	0.02
												3.2	3.18	3.18	0.011547	3.84	3.84	3.96	0.069282
												3.5	3.6	3.4	0.1	3.83	3.85	3.93	0.052915
							fig9 Total sugar content change					3.6	3.62	3.82	0.121655	3.89	3.83	3.8	0.0458258
										standard deviation		4.3	4.5	4.1	0.2	3.88	3.8	3.78	0.0525484
							41.5	42	43.5	1.04083		5.2	5.2	5.41	0.121244	3.79	3.8	3.79	0.0057735
							30.2	33	32.5	1.49332		5.1	5.12	5.08	0.02	3.85	3.87	3.92	0.0360555
							24.6	25.4	25	0.4		0.49	0.57	0.63	0.0702377
							15.9	17.5	17.9	1.0583		0.6	0.62	0.49	0.07
Fermentation for 16 days							15.2	16.5	18.4	1.60935		2.1	2.5	2.7	0.305505
Mater ratio	alcoholic strength						14	14.2	13.2	0.52915		3.6	3.9	3.4	0.251661
1：6	9.2		9	9.4			11.7	11.6	13	0.781025		6.1	5.3	7.7	1.22202
1：5	9.35		7.3	11.4								8.2	7.1	8.8	0.862168
1：4	9.7		9.6	9.8					allcoholic strength /%vol	sensory score		7.6	7.9	8.3	0.351188
1：3	9.75		9.4	10.1
1: 2	11.25		9.2	13.2
1: 1	11.3		13.2	9.4
2: 1	12.4		11.8	13
fig4 Effect of fermentation temperature on the quality of orange peel tea wine
Fermentation temperture	alcoholic strength /%vol	sensory score
20	1.83333	74.3333
24	5.86667	83.3333
28	8.3	87.3333
32	8	79.3333
36	7.76667	74
			standard deviation					standard error
1.6	2	1.9	0.208167		75	75	73	1.1547
6.3	5.5	5.8	0.404145		82	83	85	1.52753
8.3	7.8	8.8	0.5		85	89	88	2.08167
8.3	7.7	8	0.3		79	80	79	0.57735
7.8	7.8	7.7	0.057735		73	75	74	1
fig6 Effect of yeast addition on the quality of orange peel tea wine
		alcoholic strength /%vol	sensory score
	0.8	7.43333	79.6667
	1.6	7.66667	84.3333
	2.4	9.26667	85.6667
	3.2	9.46667	86.6667
	4.0	9.7	88.6667
	4.8	10.4667	89.6667
	5.6	10.4	86.3333
	6.4	9.93333	84.6667	standard deviation					standard deviation
	7.5	7.6	7.2	0.208167		80	81	78	1.52753
	7.5	7.8	7.7	0.152753		83	85	85	1.1547
	9	9.5	9.3	0.251661		87	86	84	1.52753
	9.3	9.6	9.5	0.152753		88	87	85	1.52753
	8.9	10.5	9.7	0.8		88	89	89	0.57735
	10.2	11.5	9.7	0.929157		90	90	89	0.57735
	9.8	11	10.4	0.6		85	88	86	1.52753
	10	9.8	10	0.11547		85	83	86	1.52753
														Table4 Analysis of variance of regression model
fig2 Influence of material volume ratio on the quality of orange peel tea wine													1	28	4	25	11.6	10.8	11.2	11.2
Material ratio													2	24	5.6	30	11.6	10.4	10.1	10.7
	alcoholic strength /%vol	Sensory score											3	24	4	30	9.5	9.9	10.9	10.1
1:5	7.3	75											4	32	5.6	30	11.5	11.3	11.1	11.3
1:4	7.73333	81											5	28	4	35	10.5	11.7	11.1	11.1
1:3	7.93333	87											6	32	4.8	25	11.2	11.9	12	11.7
1:2	7.53333	86											7	28	4.8	30	14.1	11.9	11.5	12.5
1:1	7.26667	84											8	32	4	30	11	12.1	10.2	11.1
			standard deviation					standard error					9	28	4.8	30	12.9	12.8	11.5	12.4
7.2	7.5	7.2	0.173205		75	79	71	4					10	32	4.8	35	11.3	11	11.3	11.2
7.6	7.8	7.8	0.11547		80	83	80	1.73205					11	28	4.8	30	12.5	12.9	11.5	12.3
8.2	7.8	7.8	0.23094		86	87	88	1					12	28	5.6	35	11.3	10.9	10.8	11
7.6	7.4	7.6	0.11547		83	89	86	3					13	24	4.8	25	11.2	10.8	10.7	10.9
7.3	7.3	7.2	0.057735		87	81	84	3					14	28	5.6	25	12.4	13.1	9.9	11.8
													15	28	4.8	30	13.2	11.8	12.5	12.5
													16	24	4.8	35	10.3	9.8	9.6	9.9
fig3 Effect of sucrose content on the quality of orange peel tea wine													17	28	4.8	30	12.7	13.5	11.6	12.6
Sucrose addition
		alcoholic strength /%vol	Sensory score
	15	5.16667	73											Table5 Contents of total phenols and total flavonoids
	20	7.83333	77
	25	8.1	83											rutin concentration mg/L	0	0.008	0.016	0.024	0.032	0.04	0.048
	30	9.06667	85											absorbance	0.179	0.216	0.286	0.334	0.359
	35	8.3	84
	40	5.53333	81
				standard deviation					standard deviation
	5.6	4.9	5	0.378594		74	74	72	1.1547
	8.5	7	8	0.763763		79	78	74	2.64575
	9	7.8	7.5	0.793725		84	83	81	1.52753
	8.6	9	9.6	0.503322		82	86	87	2.64575
	7.6	8.4	8.9	0.655744		86	87	82	2.64575
	5.3	5.5	5.8	0.251661		78	81	84	3
fig5 Influence of fermentation time on the quality of orange peel tea wine
Fermentation time
		alcoholic strength /%vol	Sensory score
	3	3.7	82
	5	6.66667	87.6667
	7	8.43333	89.6667
	9	9.23333	84.6667
	11	9.66667	81.6667
	13	11.2	77
	15	12.6	78.3333											rutin concentration mg/L	0	0.008	0.016	0.024	0.032	0.04	0.048
	17	12.6667	76.6667											absorbance	0.202333	0.225333	0.248	0.274	0.301333	0.339667	0.372667
	19	12.7	76	standard deviation					standard deviation						0.193	0.226	0.245	0.27	0.318	0.343	0.36
	4	3.4	3.7	0.3		82	80	84	2						0.213	0.224	0.249	0.272	0.292	0.321	0.382
	6.5	6.8	6.7	0.152753		89	88	86	1.52753						0.201	0.226	0.25	0.28	0.294	0.355	0.376
	9.1	7.8	8.4	0.650641		92	89	88	2.08167
	9.2	9	9.5	0.251661		83	85	86	1.52753					sampie absorbance			rutin concentration	absorbance
	9	10.3	9.7	0.650641		82	83	80	1.52753					0.365（dilute 10 times）			0	0.202
	11	11.6	11	0.34641		80	75	76	2.64575								0.008	0.225
	12.4	12.6	12.8	0.2		80	77	78	1.52753					blank			0.016	0.248
	12.5	12.6	12.9	0.208167		75	78	77	1.52753					0.078			0.024	0.274
	13	12.7	12.4	0.3		77	76	75	1								0.032	0.301
																	0.04	0.34
																	0.048	0.373
																	The concentration of rutin in the sample was obtained0.04781
																Table6 Scavenging ability of DPPH free radicals and ·OH free radicals
															A	B	C	D	E	F
														4.649	0	1	2	3	4	5
														0.502	0.0306667	0.137667	0.205333	0.350333	0.455333	0.523333
														0.503	0.027	0.135	0.181	0.389	0.45	0.535
														0.535	0.037	0.135	0.195	0.341	0.454	0.518
														0.468	0.028	0.143	0.24	0.321	0.462	0.517
														sampie absorbance	gallic acid concentration	absorbance
														0.502	0	0.031
														4.649	1	0.138
															2	0.205		By calculating the total phenol of fruit wine2.3245mg/mL
															3	0.35
															4	0.455
															5	0.523
																			1
							Original data of aroma composition analysis
							retention period			peak area	peak-to-area ratio	chemical compound
							1.334			6276600	12.59	1-Propanol, 2-methyl-
							2.314			454462	0.91	Hydrazinecarboxamide
							3.01			22320421	44.77	Ethanol
							4.07			3509	0.01	1-Propanol
							6.846			15719147	31.53	1-Butanol, 3-methyl-
							14.269			947542	1.9	Acetic acid
							16.158			160036	0.32	Propanoic acid, 2-methyl-
							16.634			55960	0.11	3-Cyclohexen-1-ol, 4-methyl-1-(1-methylethyl)-, (R)-
							17.563			103004	0.21	Butanoic acid, 2-methyl-
							17.932			98887	0.2	.alpha.-Terpineol
							19.3			54560	0.11	D-Fructose, 3-O-methyl-
							19.425			30287	0.06	Acetic acid, 2-phenylethyl ester
							19.475			137551	0.28	Benzaldehyde, 2,4-dimethyl-
							19.609			53459	0.11	Anethole
							19.674			80406	0.16	Hexanoic acid
							19.745			49587	0.1	2,6-Octadien-1-ol, 3,7-dimethyl-, (Z)-
							20.544			1052187	2.11	Phenylethyl Alcohol
							21.919			272031	0.55	Octanoic acid
							23.403			66306	0.13	4-Hydroxy-2-methylacetophenone
							23.933			240000	0.48	n-Decanoic acid
							24.305			711903	1.43	2,4-Di-tert-butylphenol
							25.149			45609	0.09	Benzofuran, 2,3-dihydro-
							25.467			26231	0.05	6-Octadecenoic acid, methyl ester, (Z)-
							25.886			43772	0.09	10,13-Octadecadienoic acid, methyl ester
							30.685			510637	1.02	n-Hexadecanoic acid
